# Supplementary material for: Analysing university hospitals’ clinical decision support system alerts for inpatient medication prescribing process: a cross-sectional register-based study
Source: Research Square preprint supplement (doi:10.21203/rs.3.rs-7196044/v1), 2025-08-21
Supplement: Supplementary file 1 [file 1fbf1216271417dbeee40a6b.xlsx]

## Sheet: Taul1
OPERATIIVISET ERIKOISALAT				KONSERVATIIVISET ERIKOISALAT
Varoitustyyppi	N	Ohitus %		Varoitustyyppi	N	Ohitus %
Interaktio	119838	0.94		Interaktio	114824	0.93
Lääkeainepari	N	Ohitus %	Varoituksen taso	Lääkeainepari	N	Ohitus %	Varoituksen taso
Oksikodoni/Pregabaliini	11462	0.94	C4	Oksikodoni/Pregabaliini	6318	0.94	C4
Metyyliprednisoloni/Takrolimuusi	8062	0.99	C4	Hydrokortisoni/Ibuprofeeni	4038	0.98	C4
Enoksapariini/Abiksabaani	3625	0.93	D0	Metyyliprednisoloni/Takrolimuusi	3886	0.98	C4
Hydroksitsiini/Ondansetroni	3154	0.92	D0	Enoksapariini/Abiksabaani	2734	0.86	D0
Amlodipiini/Takrolimuusi	2965	0.99	C3	Spironolaktoni/Kaliumkloridi	2456	0.94	D3
Tramadoli/Pregabaliini	2567	0.91	C4	Spironolaktoni/Ramipriili	2143	0.94	C4
Metoklopramidi/Takrolimuusi	2326	1	C1	Hydrokortisoniaseponaatti/ Ibuprofeeni	2089	0.97	C4
Hydroksitsiini/Droperidoli	2060	0.96	D0	Kortisoli/Ibuprofeeni	1960	0.98	C4
Tramadoli/Varfariini	1945	0.96	D2	Metyyliprednisoloni/Siklosporiini	1855	0.97	C1
Haloperidoli/Ondansetroni	1587	0.88	D0	Amlodipiini/Takrolimuusi	1774	0.98	C3
OPERATIIVISET ERIKOISALAT				KONSERVATIIVISET ERIKOISALAT
Varoitustyyppi	N	Ohitus %		Varoitustyyppi	N	Ohitus %
Annos	26792	0.96		Annos	35034	0.96
Lääkeaine	N	Ohitus %	Varoituksen taso	Lääkeaine	N	Ohitus %	Varoituksen taso
Kalsiumkarbonaatti-kolekalsiferoli	2383	0.98	N/A	Tsopikloni	2649	0.953945	N/A
Tsopikloni	1487	0.96	N/A	Kalsiumkarbonaatti-kolekalsiferoli	2542	0.980724	N/A
Diatsepaami	1299	0.96	N/A	Oksaliplatiini	1909	0.995285	N/A
Kalsiumkloridi	823	0.94	N/A	Kalsiumkloridi	1507	0.961513	N/A
Salbutamoli	821	0.97	N/A	Setiritsiini	1430	0.962937	N/A
Enalapriili	752	0.98	N/A	Diatsepaami	1288	0.954969	N/A
Asetyylisalisyylihappo	734	0.96	N/A	Furosemidi	924	0.96645	N/A
Setiritsiini	627	0.97	N/A	Asetyylisalisyylihappo	889	0.96288	N/A
Kolekalsiferoli	568	0.98	N/A	Salbutamoli	880	0.957955	N/A
Furosemidi	516	0.98	N/A	Sisplatiini	860	0.997674	N/A
OPERATIIVISET ERIKOISALAT				KONSERVATIIVISET ERIKOISALAT
Varoitustyyppi	N	Ohitus %		Varoitustyyppi	N	Ohitus %
Päällekkäinen lääkemääräys	65866	0.69		Päällekkäinen lääkemääräys	37484	0.74
Lääkeaine	N	Ohitus %	Varoituksen taso	Lääkeaine	N	Ohitus %	Varoituksen taso
Ondansetroni, Suun kautta	6120	0.54	N/A	Kodeiini-parasetamoli/parasetamoli, Suun kautta	2770	0.62	N/A
Oksikodoni, Suun kautta	4987	0.54	N/A	Bisoprololi, Suun kautta	1864	0.86	N/A
Parasetamoli, Suun kautta	3689	0.59	N/A	Kalsium + D3/Kalsium, Suun kautta	1422	0.74	N/A
Oksikodoni, Lihakseen	2336	0.45	N/A	Parasetamoli , Suun kautta	1273	0.82	N/A
Kodeiini-parasetamoli/parasetamoli	2261	0.87	N/A	Furosemidi, Suun kautta	1110	0.82	N/A
Oksikodoni-naloksoni, Suun kautta	2161	0.65	N/A	Kaliumkloridi, Suun kautta	1053	0.81	N/A
Kaliumkloridi, Suun kautta	1920	0.9	N/A	Salbutamoli-ipratropiumbromidi/salbutamoli, Inhalaationa	850	0.83	N/A
Bisoprololi, Suun kautta	1441	0.86	N/A	Levotyroksiininatrium, Suun kautta	770	0.8	N/A
Oksikodoni-naloksoni/Oksikodoni, Suun kautta	1189	0.91	N/A	Prednisoloni, Suun kautta	674	0.76	N/A
Magnesiumsulfaatti, Laskimoon	970	0.95	N/A	Enoksapariini, Ihon alle	651	0.79	N/A
OPERATIIVISET ERIKOISALAT				KONSERVATIIVISET ERIKOISALAT
Varoitustyyppi	N	Ohitus %		Varoitustyyppi	N	Ohitus %
Päällekkäinen lääkehoito	12315	0.82		Päällekkäinen lääkehoito	14163	0.86
ATC-koodi	N	Ohitus %	Monennestako määräyksestä varoitus tulee	ATC-koodi	N	Ohitus %	Monennestako määräyksestä varoitus tulee
C03CA Sulfonamidit	1788	0.9	4.	C03CA Sulfonamidit	3874	0.93	4.
M01AE Propionihappojohodokset	1628	0.72	2.	B01AC Aggregaation estäjät lukuunottamatta hepariinia	927	0.83	3.
N02AA Luonnolliset opiumalkaloidit	1158	0.82	3.	N02AA Luonnolliset opiumalkaloidit	899	0.84	3.
N01BB Amidit	789	0.81	2.	B01AB Hepariiniryhmä	841	0.9	2.
N02BE Anilidit, myös yhdistelmävalmisteet	441	0.61	3.	R03AK Adrenergistenlääkeaineiden ja antikolinergien yhdistelmä	551	0.89	2.
C08CA Dihydropyridiinijohdokset	410	0.87	2.	A11CC D-vitamiini ja sen kaltaiset yhdisteet	369	0.92	2.
A10AD Insuliinisekoitteet	323	0.8	2.	H02AB Glukokortikoidit	365	0.83	3.
B01AB Hepariiniryhmä	322	0.68	2.	A10AB Lyhytvaikutteiset(insuliinit)	319	0.86	2.
N05CM Muut unilääkkeet	276	0.93	2.	C01BD Rytmihäiriölääkkeet, Ryhmä III	292	0.9	2.
A11CC D-vitamiini ja sen kaltaiset yhdisteet	266	0.91	2.	N05CM Muut unilääkkeet	254	0.98	2.
OPERATIIVISET ERIKOISALAT				KONSERVATIIVISET ERIKOISALAT
Varoitustyyppi	N	Ohitus %		Varoitustyyppi	N	Ohitus %
Raskaus	5381	0.97		Raskaus	903	0.97
Lääkeaine	N	Ohitus %	Varoituksen taso	Lääkeaine	N	Ohitus %	Varoituksen taso
Misoprostoli	2043	0.988253	D	Parasetamoli-Kodeiini	258	1	C2
Daltepariini	1226	0.969005	C2	Misoprostoli	88	1	D
Parasetamoli-Kodeiini	852	0.985915	C2	Syklofosfamidi	85	1	D
Enoksapariini	172	0.895349	C2	Enoksapariini	68	0.87	C2
Metoklopramidi	177	0.98	C2(C1)	Metoklopramidi	63	0.95	C2(C1)
Oksatsepaami	112	0.973214	C2	Oksikodoni	37	1	C1
Oksikodoni	111	0.963964	C1	Hydrokortisoni	37	0.97	C1
Tramadoli	52	0.846154	C2	Daltepariini	33	0.91	C2
Tintsapariini	46	1	C2	Ibuprofeeni	23	0.96	C1
Enalapriili	40	0.93	D	Epirubisiini	19	1	D
OPERATIIVISET ERIKOISALAT				KONSERVATIIVISET ERIKOISALAT
Varoitustyyppi	N	Ohitus %		Varoitustyyppi	N	Ohitus %
Imetys	2179	0.94		Imetys	770	0.96
Lääkeaine	N	Ohitus %	Varoituksen taso	Lääkeaine	N	Ohitus %	Varoituksen taso
Oksikodoni	797	0.948557	C	Oksikodoni	129	0.976744	C
Tramadoli	573	0.917976	C	Diatsepaami	87	0.931034	C
Parasetamoli-Kodeiini	424	0.926887	D	Trastutsumabi	82	0.987805	C
Oksikodoni-Naloksoni	101	0.980198	C	Tramadoli	81	0.901235	C
Diatsepaami	70	0.928571	C	Parasetamoli-Kodeiini	59	1	D
Atsitromysiini	54	0.944444	C	Dosetakseli	48	1	D
Metamitsolinatrium-Pitofenoni	31	0.935484	C	Syklofosfamidi	32	1	D
Metotreksaatti	14	1	D	Doksorubisiini	22	1	D
Melatoniini	10	1	C	Trastutsumabi-Emtansiini	15	1	C
Siprofloksasiini	10	1	C	Melatoniini	15	0.933333	C
OPERATIIVISET ERIKOISALAT				KONSERVATIIVISET ERIKOISALAT
Varoitustyyppi	N	Ohitus %		Varoitustyyppi	N	Ohitus %
Geriatrinen	13676	0.97		Geriatrinen	16676	0.97
Lääkeaine	N	Ohitus %	Varoituksen taso	Lääkeaine	N	Ohitus %	Varoituksen taso
Metoklopramidi	2624	0.962652	D	Metoklopramidi	3148	0.966963	D
Pregabaliini	1263	0.972288	D	Magnesiumhydroksidi	1601	0.96877	D
Magnesiumhydroksidi	1243	0.972647	D	Natriumpikosulfaatti	1203	0.963425	D
Haloperidoli	1099	0.935396	D	Haloperidoli	1161	0.930233	D
Estradioli	1052	0.985741	D	Estradioli	1077	0.987001	D
Natriumpikosulfaatti	762	0.963255	D	Pregabaliini	965	0.977202	D
Diatsepaami	644	0.950311	D	Klonidiini	949	0.956797	D
Algiinihappo	430	0.972093	D	Diatsepaami	791	0.960809	D
Dipyridamoli ja asetyylisalisyylihappo	411	0.985401	D	Amiodaroni	538	0.975836	D
Propranololi	308	0.99026	D	Algiinihappo	481	0.972973	D
OPERATIIVISET ERIKOISALAT				KONSERVATIIVISET ERIKOISALAT

## Sheet: Englanti
CONSERVATIVE SPECIALTIES				OPERATIVE SPECIALTIES
Alert type	N	Override %		Alert type	N	Override %
Drug-Drug/Interaction	114824	0.93		Drug-Drug/Interaction	119838	0.94
Drug-Drug combination	N	Override %	Warning level	Drug-Drug combination	N	Override %	Warning level
Oxycodone/Pregabalin	6318	0.94	C4	Oxycodone/Pregabalin	11462	0.94	C4
Hydrocortisone/Ibuprofen	5998	0.98	C4	Methylprednisolone/Tacrolimus	8062	0.99	C4
Methylprednisolone/Tacrolimus	3886	0.98	C4	Enoxaparin/Apixaban	3625	0.93	D0
Enoxaparin/Apixaban	2734	0.86	D0	Hydroxyzine/Ondansetron	3154	0.92	D0
Spironolactone/Potassium Chloride	2456	0.94	D3	Amlodipine/Tacrolimus	2965	0.99	C3
Spironolactone/Ramipril	2143	0.94	C4	Tramadol/Pregabalin	2567	0.91	C4
Hydrocortisone and antibiotics/ Ibuprofen	2089	0.97	C4	Metoclopramide/Tacrolimus	2326	1	C1
Methylprednisolone/Ciclosporin	1855	0.97	C1	Hydroxyzine/Droperidoli	2060	0.96	D0
Amlodipine/Tacrolimus	1774	0.98	C3	Tramadol/Warfarin	1945	0.96	D2
Oxycodone/Ciclosporin	1461	0.97	C3	Haloperidol/Ondansetron	1587	0.88	D0
CONSERVATIVE SPECIALTIES				OPERATIVE SPECIALTIES
Alert type	N	Override %		Alert type	N	Override %
Dose	35034	0.96		Dose	26792	0.96
Drug	N	Override %	Warning level	Drug	N	Override %	Warning level
Zopiclone	2649	0.953945	N/A	Calsium Carbonate-Vitamin D	2383	0.98	N/A
Calsium Carbonate-Vitamin D	2542	0.980724	N/A	Zopiclone	1487	0.96	N/A
Oxaliplatin	1909	0.995285	N/A	Diazepam	1299	0.96	N/A
Calsium Chloride	1507	0.961513	N/A	Calsium Chloride	823	0.94	N/A
Cetirizine	1430	0.962937	N/A	Salbutamol	821	0.97	N/A
Diazepam	1288	0.954969	N/A	Enalapril	752	0.98	N/A
Furosemide	924	0.96645	N/A	Acetylsalicylic acid	734	0.96	N/A
Acetylsalicylic acid	889	0.96288	N/A	Cetirizine	627	0.97	N/A
Salbutamol	880	0.957955	N/A	Vitamin D	568	0.98	N/A
Cisplatin	860	0.997674	N/A	Furosemide	516	0.98	N/A
CONSERVATIVE SPECIALTIES				OPERATIVE SPECIALTIES
Aler type	N	Override %		Alert type	N	Override %
Duplicate Medication	37484	0.74		Duplicate Medication	65866	0.69
Drug	N	Override %	Warning level	Drug	N	Override %	Warning level
Codeine-Paracetamol/Paracetamol (per oral)	2770	0.62	N/A	Ondansetron (per oral)	6120	0.54	N/A
Bisoprolol (per oral)	1864	0.86	N/A	Oxycodone (per oral)	4987	0.54	N/A
Calsium + Vitamin D/Calsium (per oral)	1422	0.74	N/A	Paracetamol (per oral)	3689	0.59	N/A
Paracetamol (per oral)	1273	0.82	N/A	Oxycodone (intramuscular)	2336	0.45	N/A
Furosemide (per oral)	1110	0.82	N/A	Codeine-Paracetamol/Paracetamol (per oral)	2261	0.87	N/A
Potassium chloride (per oral)	1053	0.81	N/A	Oxycodone-naloksoni (per oral)	2161	0.65	N/A
Salbutamol-ipratropium bromide/Salbutamol (inhalation)	850	0.83	N/A	Potassium chloride (per oral)	1920	0.9	N/A
Levothyroxine Sodium (per oral)	770	0.8	N/A	Bisoprolol (per oral)	1441	0.86	N/A
Prednisolone (per oral)	674	0.76	N/A	Oxycodone-naloksoni/Oxycodone (per oral)	1189	0.91	N/A
Enoxaparin (sub cutaneous)	651	0.79	N/A	Magnesium Sulfate (intravenous)	970	0.95	N/A
CONSERVATIVE SPECIALTIES				OPERATIVE SPECIALTIES
Alert type	N	Override %		Alert type	N	Override %
Duplicate Therapy	14163	0.86		Duplicate Therapy	12315	0.82
ATC-code	N	Override %	After how many prescriptions alert triggers	ATC-code	N	Override %	After how many prescriptions alert triggers
C03CA Sulfonamides, plain	3874	0.93	4.	C03CA Sulfonamides, plain	1788	0.9	4.
B01AC Platelet aggregation inhibitors excl. Heparin	927	0.83	3.	M01AE Propionic acid derivatives	1628	0.72	2.
N02AA Natural opium alkaloids	899	0.84	3.	N02AA Natural opium alkaloids	1158	0.82	3.
B01AB Heparin group	841	0.9	2.	N01BB Amides	789	0.81	2.
R03AK Adrenergics in combination with corticosteroids or other drugs	551	0.89	2.	N02BE Anilides	441	0.61	3.
A11CC Vitamin D and analogues	369	0.92	2.	C08CA Dihydropyridine derivatives	410	0.87	2.
H02AB Glucocorticoids	365	0.83	3.	A10AD Insulins and analogues	323	0.8	2.
A10AB Insulins and analogues for injection, fast acting	319	0.86	2.	B01AB Heparin group	322	0.68	2.
C01BD Antiarrhythmics, class I and III	292	0.9	2.	N05CM Other hypnotics and sedatives	276	0.93	2.
N05CM Other hypnotics and sedatives	254	0.98	2.	A11CC Vitamin D and analogues	266	0.91	2.
CONSERVATIVE SPECIALTIES				OPERATIVE SPECIALTIES
Alert type	N	Override %		Alert type	N	Override %
Pregnancy	903	0.97		Pregnancy	5381	0.97
Drug	N	Override %	Warning level	Drug	N	Override %	Warning level
Codeine-Paracetamol	258	1	C2	Misoprostol	2043	0.988253	D
Misoprostol	88	1	D	Dalteparin	1226	0.969005	C2
Cyclophosphamide	85	1	D	Codeine-Paracetamol	852	0.985915	C2
Enoxaparin	68	0.87	C2	Enoxaparin	172	0.895349	C2
Metoclopramide	63	0.95	C2(C1)	Metoclopramide	177	0.98	C2(C1)
Oxycodone	37	1	C1	Oxazepam	112	0.973214	C2
Hydrocortisone	37	0.97	C1	Oxycodone	111	0.963964	C1
Dalteparin	33	0.91	C2	Tramadol	52	0.846154	C2
Ibuprofen	23	0.96	C1	Tinzaparin	46	1	C2
Epirubicin	19	1	D	Enalapril	40	0.93	D
CONSERVATIVE SPECIALTIES				OPERATIVE SPECIALTIES
Alert type	N	Override %		Alert type	N	Override %
Lactation	770	0.96		Lactation	2179	0.94
Drug	N	Override %	Warning level	Drug	N	Override %	Warning level
Oxycodone	129	0.976744	C	Oxycodone	797	0.948557	C
Diazepam	87	0.931034	C	Tramadol	573	0.917976	C
Trastutsumab	82	0.987805	C	Codeine-Paracetamol	424	0.926887	D
Tramadol	81	0.901235	C	Oxycodone-Naloxone	101	0.980198	C
Codeine-Paracetamol	59	1	D	Diazepam	70	0.928571	C
Dosetaxel	48	1	D	Azithromycin	54	0.944444	C
Cyclophosphamide	32	1	D	Metamizole sodium	31	0.935484	C
Doxorubicin	22	1	D	Methotrexate	14	1	D
Tratsumab emtansine	15	1	C	Melatonin	10	1	C
Melatonin	15	0.933333	C	Ciprofloxacin	10	1	C
CONSERVATIVE SPECIALTIES				OPERATIVE SPECIALTIES
Alert type	N	Override %		Alert type	N	Override %
Geriatric	16676	0.97		Geriatric	13676	0.97
Drug	N	Override %	Warning level	Drug	N	Override %	Warning level
Metoclopramide	3148	0.966963	D	Metoclopramide	2624	0.962652	D
Magnesium Hydroxide	1601	0.96877	D	Pregabalin	1263	0.972288	D
Sodium Picosulfate	1203	0.963425	D	Magnesium Hydroxide	1243	0.972647	D
Haloperidol	1161	0.930233	D	Haloperidol	1099	0.935396	D
Estradiol	1077	0.987001	D	Estradiol	1052	0.985741	D
Pregabalin	965	0.977202	D	Sodium Picosulfate	762	0.963255	D
Clonidine	949	0.956797	D	Diazepam	644	0.950311	D
Diazepam	791	0.960809	D	Alginic Acid	430	0.972093	D
Amiodarone	538	0.975836	D	Dipyridamole and Acetylsalicylic acid	411	0.985401	D
Alginic Acid	481	0.972973	D	Propranolol	308	0.99026	D
